# Supplementary material for: Mutation-Driven Immune Microenvironments in Non-Small Cell Lung Cancer: Unrevealing Patterns through Cluster Analysis
Source: PubMed Central journal article supplement — Yonsei Med J. 2024 Sep 3;65(12):683–94. doi: 10.3349/ymj.2024.0062 (PMC11605048; doi:10.3349/ymj.2024.0062), 2024-09-03
Supplement: ymj-65-683-s002.pdf [file ymj-65-683-s002.pdf]

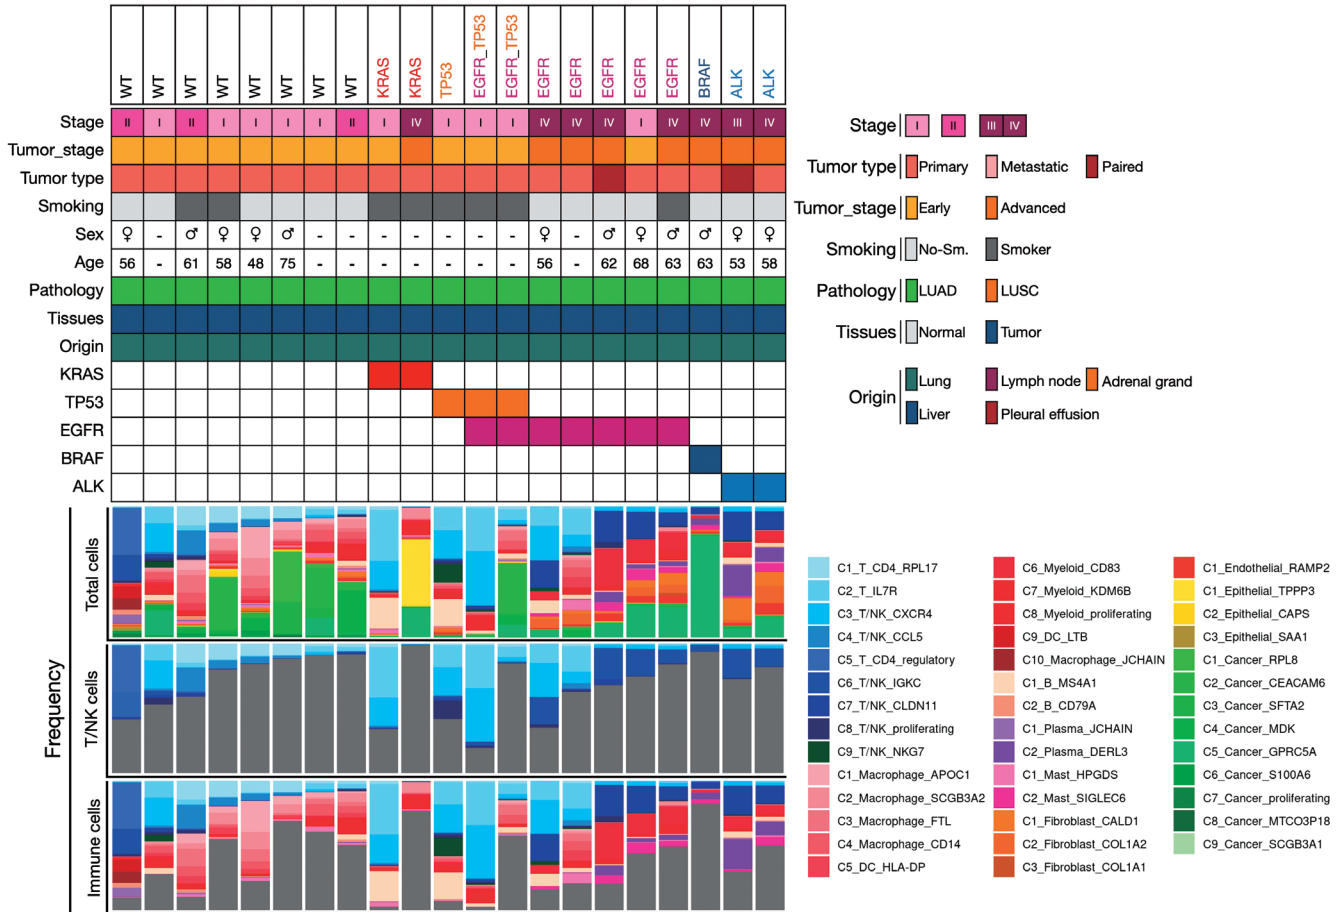

**Supplementary Fig. 2.** Stacked bar plots showing the clinical information of the 21 patients with primary tumor data and the proportion of the 41 clusters assigned a cell type for each patient. The three stacked bar plots represent the total cell types, T/NK cell types, and immune cell types, respectively.
