# Supplementary material for: Mutation-Driven Immune Microenvironments in Non-Small Cell Lung Cancer: Unrevealing Patterns through Cluster Analysis
Source: PubMed Central journal article supplement — Yonsei Med J. 2024 Sep 3;65(12):683–94. doi: 10.3349/ymj.2024.0062 (PMC11605048; doi:10.3349/ymj.2024.0062), 2024-09-03
Supplement: ymj-65-683-s003.pdf [file ymj-65-683-s003.pdf]

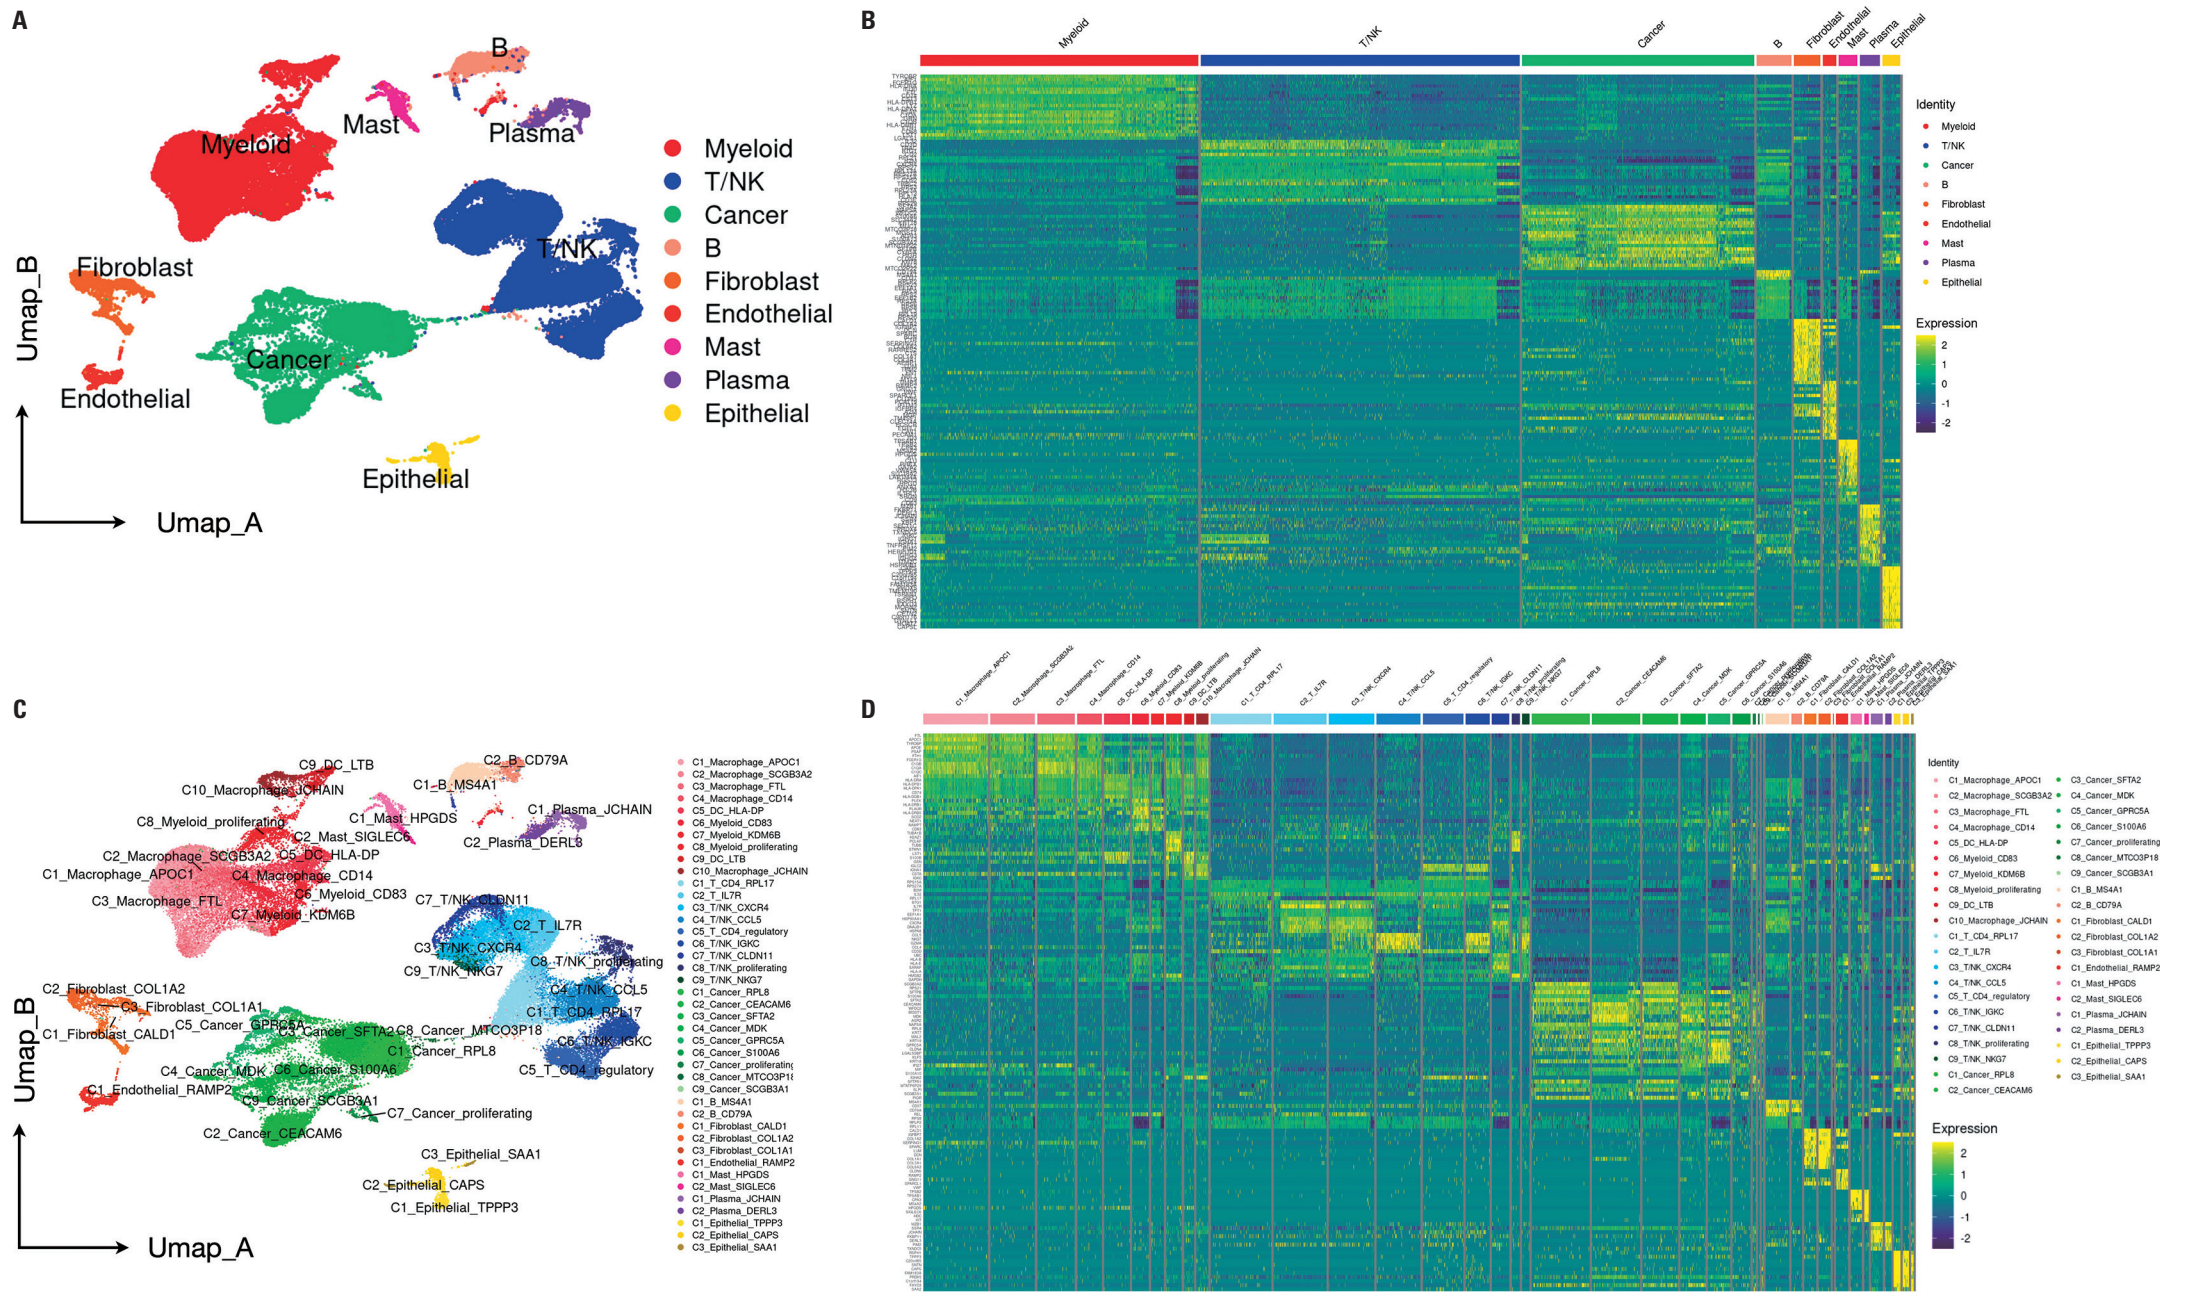

**Supplementary Fig. 3.** (A) UMAP plot of the primary tumor data from NSCLC patients according to nine cell types. (B) Heatmap visualizing the expression levels for each of the nine cell types and its top genes. (C) UMAP plot of the primary tumor data from NSCLC patients according to 41 cluster assigned with cell types. (D) Heatmap visualizing the expression levels for each of the 41 cluster assigned with cell types and their top genes. NSCLC, non-small cell lung cancer; UMAP, Uniform Manifold Approximation and Projection.
