# Supplementary material for: Mutation-Driven Immune Microenvironments in Non-Small Cell Lung Cancer: Unrevealing Patterns through Cluster Analysis
Source: PubMed Central journal article supplement — Yonsei Med J. 2024 Sep 3;65(12):683–94. doi: 10.3349/ymj.2024.0062 (PMC11605048; doi:10.3349/ymj.2024.0062), 2024-09-03
Supplement: ymj-65-683-s004.pdf [file ymj-65-683-s004.pdf]

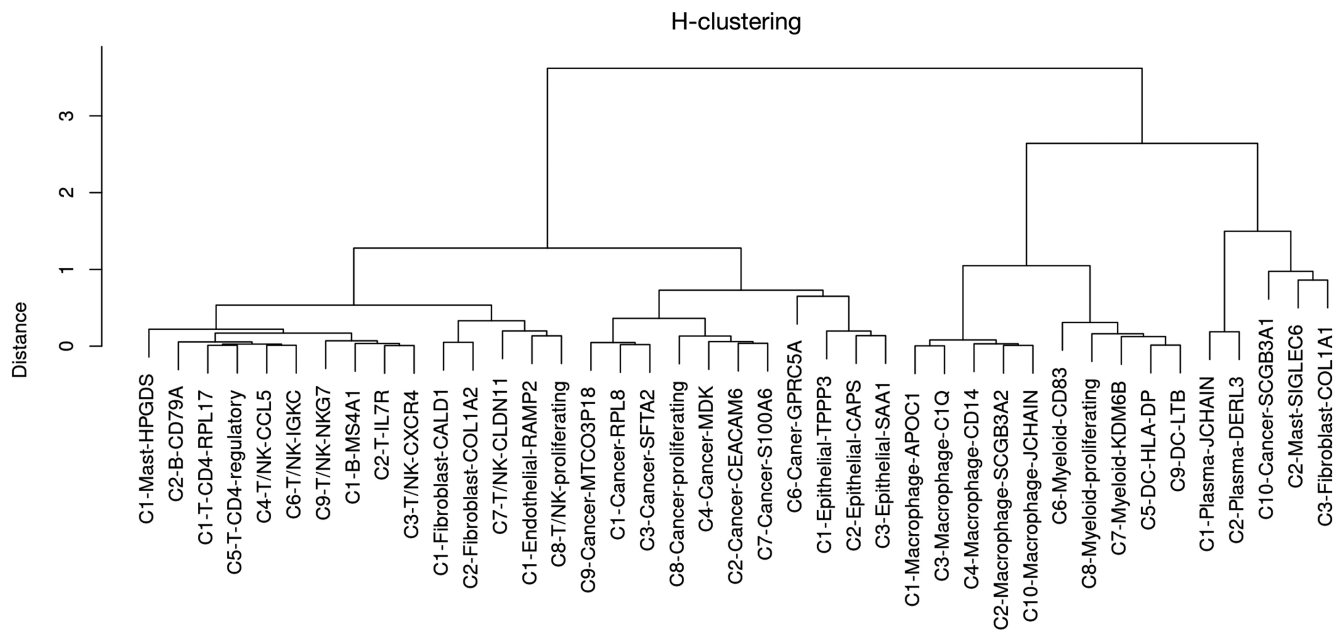

**Supplementary Fig. 4.** Dendrogram illustrating hierarchical clustering (H-clustering) of the 41 cluster assigned with cell types observed in Fig. 2C and D.
