# Supplementary material for: Mutation-Driven Immune Microenvironments in Non-Small Cell Lung Cancer: Unrevealing Patterns through Cluster Analysis
Source: PubMed Central journal article supplement — Yonsei Med J. 2024 Sep 3;65(12):683–94. doi: 10.3349/ymj.2024.0062 (PMC11605048; doi:10.3349/ymj.2024.0062), 2024-09-03
Supplement: ymj-65-683-s005.pdf [file ymj-65-683-s005.pdf]

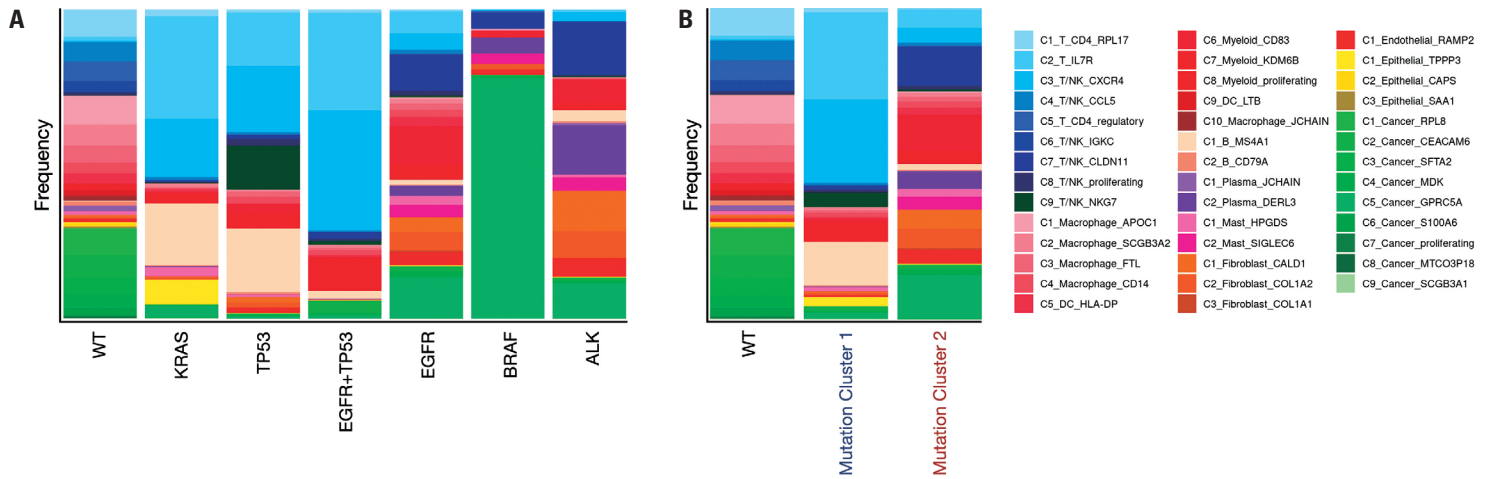

**Supplementary Fig. 5.** (A) Percentage of the composition of 41 cluster assigned with cell type by mutation, visualized using a stacked bar plot. (B) Percentage of the composition of 41 clusters with cell type assigned per cluster was visualized using a stacked bar plot.
