# Supplementary material for: Mutation-Driven Immune Microenvironments in Non-Small Cell Lung Cancer: Unrevealing Patterns through Cluster Analysis
Source: PubMed Central journal article supplement — Yonsei Med J. 2024 Sep 3;65(12):683–94. doi: 10.3349/ymj.2024.0062 (PMC11605048; doi:10.3349/ymj.2024.0062), 2024-09-03
Supplement: ymj-65-683-s006.pdf [file ymj-65-683-s006.pdf]

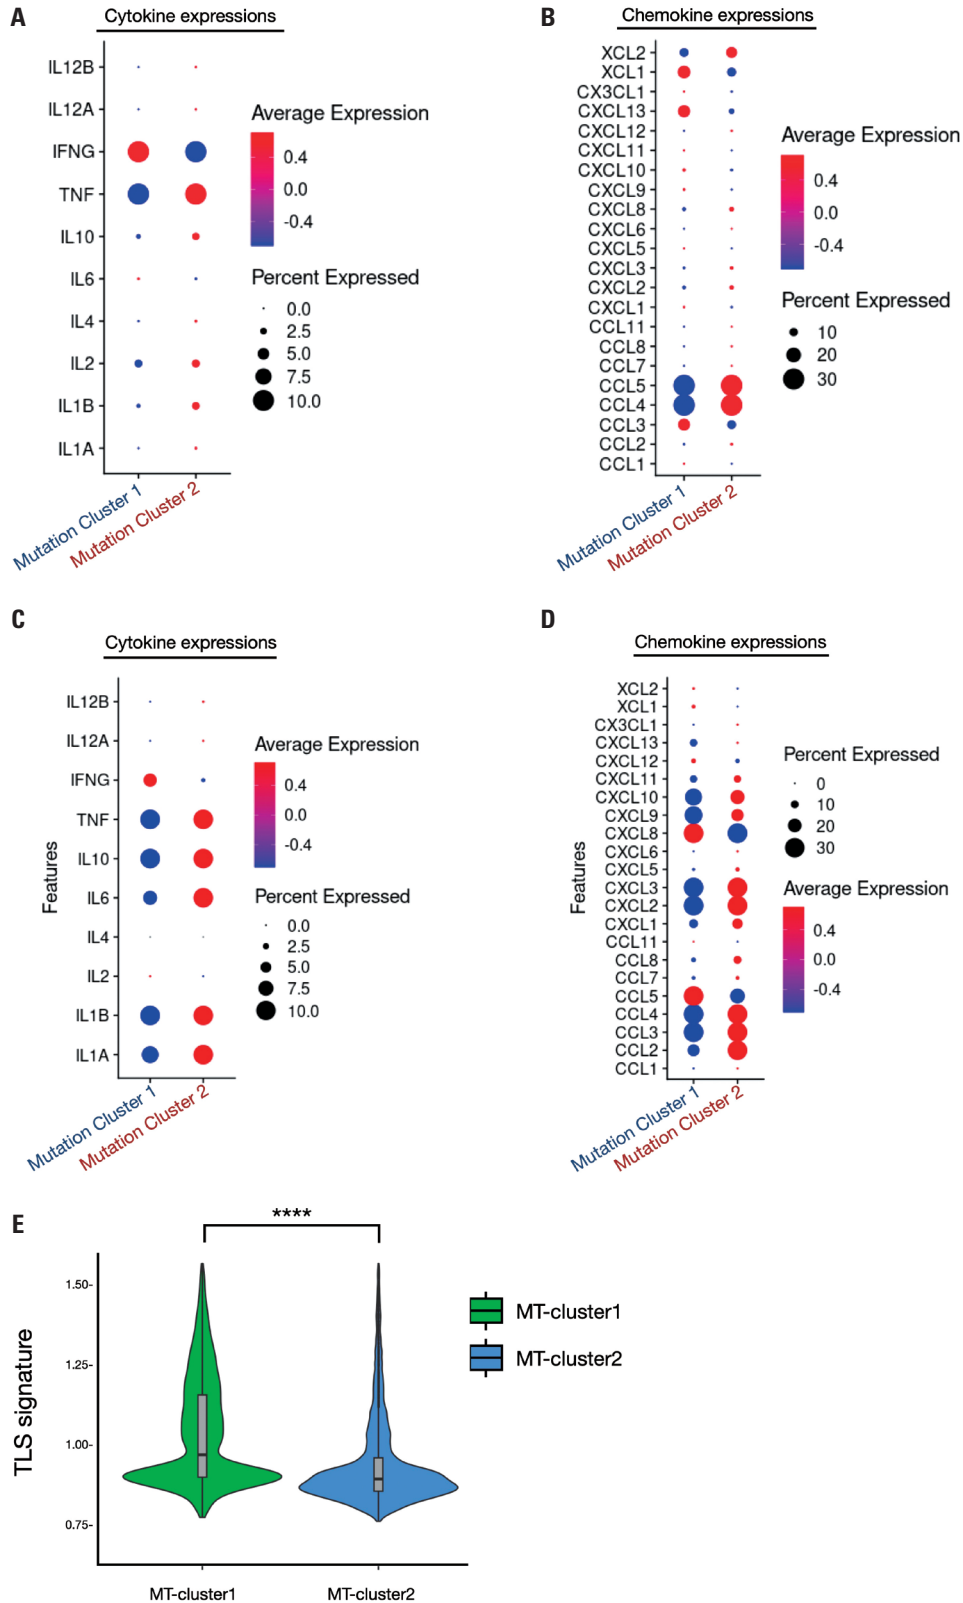

**Supplementary Fig. 6.** (A) Expression of cytokines (*IL1A*, *IL1B*, *IL2*, *IL4*, *IL6*, *IL10*, *TNF*, *IFNG*, *IL12A*, *IL12B*) by cluster in T/NK subset visualized using a dot plot. (B) Expression of chemokines (*CCL1*, *CCL2*, *CCL3*, *CCL4*, *CCL5*, *CCL7*, *CCL8*, *CCL11*, *CXCL1*, *CXCL2*, *CXCL3*, *CXCL5*, *CXCL6*, *CXCL8*, *CXCL9*, *CXCL10*, *CXCL11*, *CXCL12*, *CXCL13*, *CX3CL*, *XCL1*, *XCL2*) by cluster in the T/NK subset visualized using a dot plot. (C) Expression of cytokines (*IL1A*, *IL1B*, *IL2*, *IL4*, *IL6*, *IL10*, *TNF*, *IFNG*, *IL12A*, *IL12B*) by cluster in the myeloid subset visualized using a dot plot. (D) Expression of chemokines (*CCL1*, *CCL2*, *CCL3*, *CCL4*, *CCL5*, *CCL7*, *CCL8*, *CCL11*, *CXCL1*, *CXCL2*, *CXCL3*, *CXCL5*, *CXCL6*, *CXCL8*, *CXCL9*, *CXCL10*, *CXCL11*, *CXCL12*, *CXCL13*, *CX3CL*, *XCL1*, *XCL2*) by cluster in the myeloid subset visualized using a dot plot. (E) Violin plot comparing the TLS signature scores between MT-cluster1 and MT-cluster2. The TLS signature scores were computed using the AddModuleScore function based on TLS-associated genes. The plot shows a significant difference in the TLS signature scores between the two clusters, with MT-cluster1 exhibiting a higher TLS signature score compared to MT-cluster2.
